# Supplementary material for: Manganese silicate drapes as a novel electrode material for supercapacitors
Source: Royal Society of Chemistry journal article supplement (doi:10.1039/c6ra19102a), 2016-01-01
Supplement: c6ra19102a1.pdf [file c6ra19102a1.pdf]

## Manganese silicate drapes as a novel electrode material for supercapacitors

Hong-Yan Wang, Yue-Ya Wang, Xue Bai, Huan Yang, Jian-Ping Han, Ning Lun,

Yong-Xin Qi\*, Yu-Jun Bai\*

Key Laboratory for Liquid-Solid Structural Evolution and Processing of Materials

(Ministry of Education), Shandong University, Jinan 250061, PR China

\* E-mail: byj97@126.com (Y.-J. Bai), qyx66@sdu.edu.cn (Y.-X. Qi).

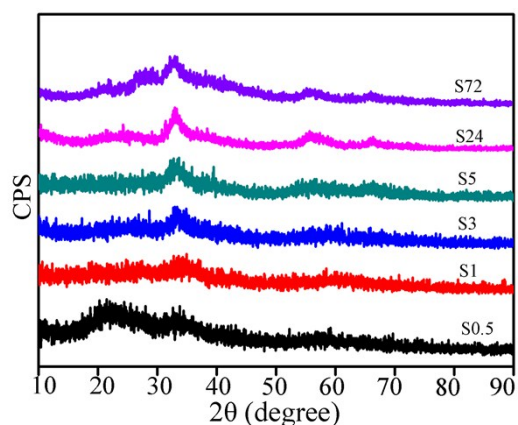

Fig. A1. XRD patterns of S0.5, S1, S3, S5, S24 and S72.

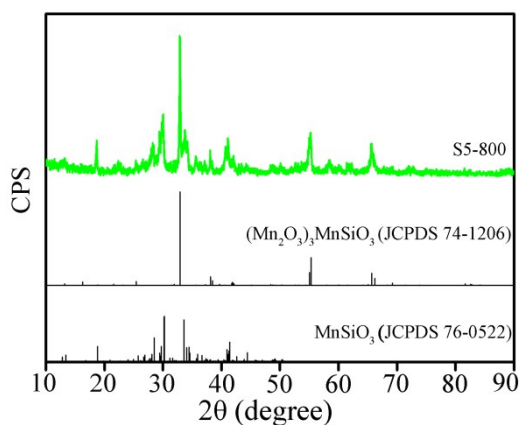

Fig. A2. XRD pattern of S5-800 after heating S5 at 800 °C for 5 h in air.

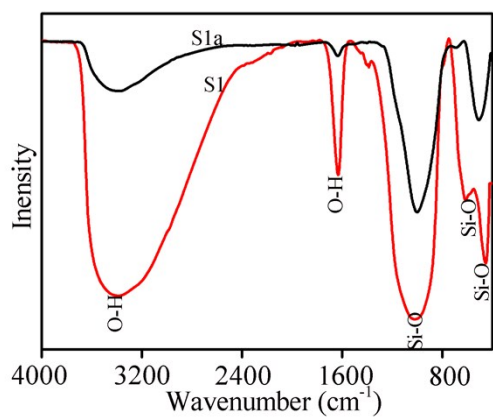

Fig. A3 FTIR spectra of S1a and S1.

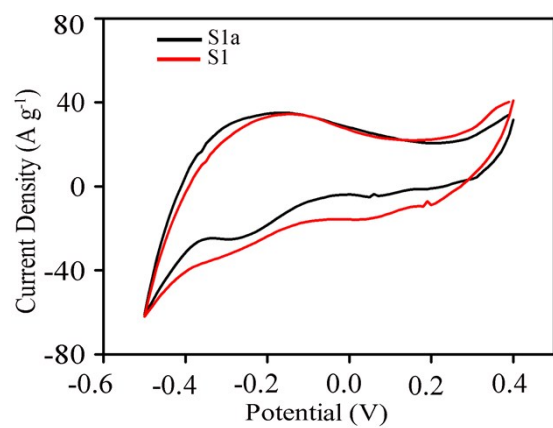

Fig. A4 CV plots of S1a and S1 at  $10 \text{ mV s}^{-1}$  in 1M KOH electrolyte.
